# Supplementary material
Source: Springer Nature journal article supplement (https://www.springermedizin.de/resource/supplementary/12889_2012_4478_MOESM6_ESM.pdf/9493236)

# The knowledge to action cycle (KTAC)

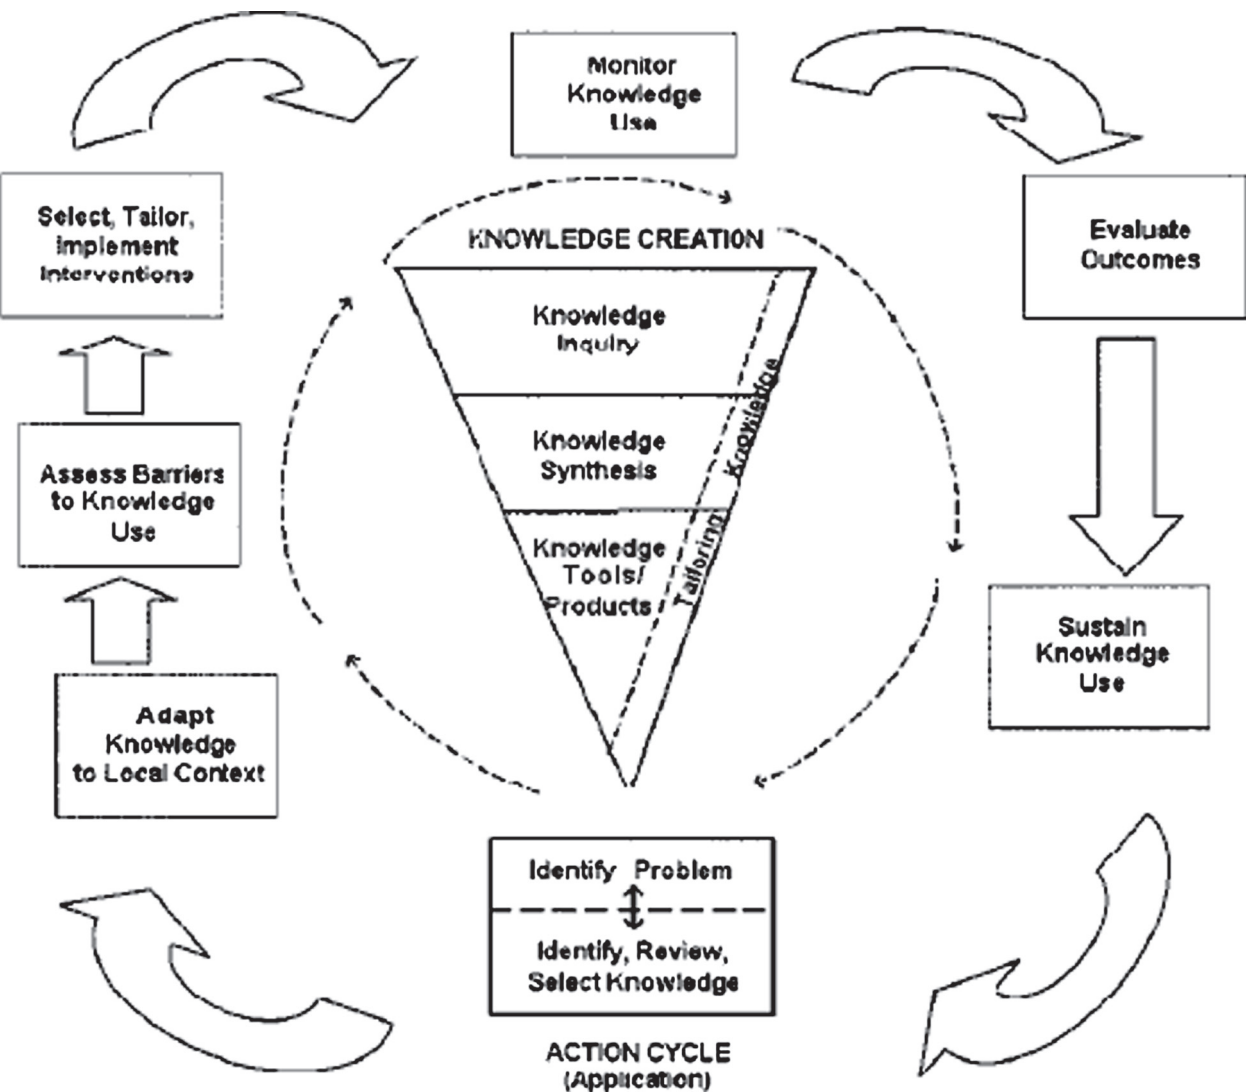

Supplement: MOESM6 [file 9493236]
